# Supplementary material for: Identification of a residue crucial for the angiostatic activity of human mini tryptophanyl-tRNA synthetase by focusing on its molecular evolution
Source: PubMed Central journal article supplement (PMC4837363; doi:10.1038/srep24750), 2016-04-20
Supplement: srep24750-s1.pdf [file srep24750-s1.pdf]

# Supplementary Figures

**Identification of a residue crucial for the angiostatic activity of human mini tryptophanyl-tRNA synthetase by focusing on its molecular evolution**

**Terumasa Nakamoto, Miki Miyanokoshi, Tomoaki Tanaka,  
and Keisuke Wakasugi\***

Department of Life Sciences, Graduate School of Arts and Sciences, The University of Tokyo, 3-8-1 Komaba, Meguro-ku, Tokyo 153-8902, Japan.

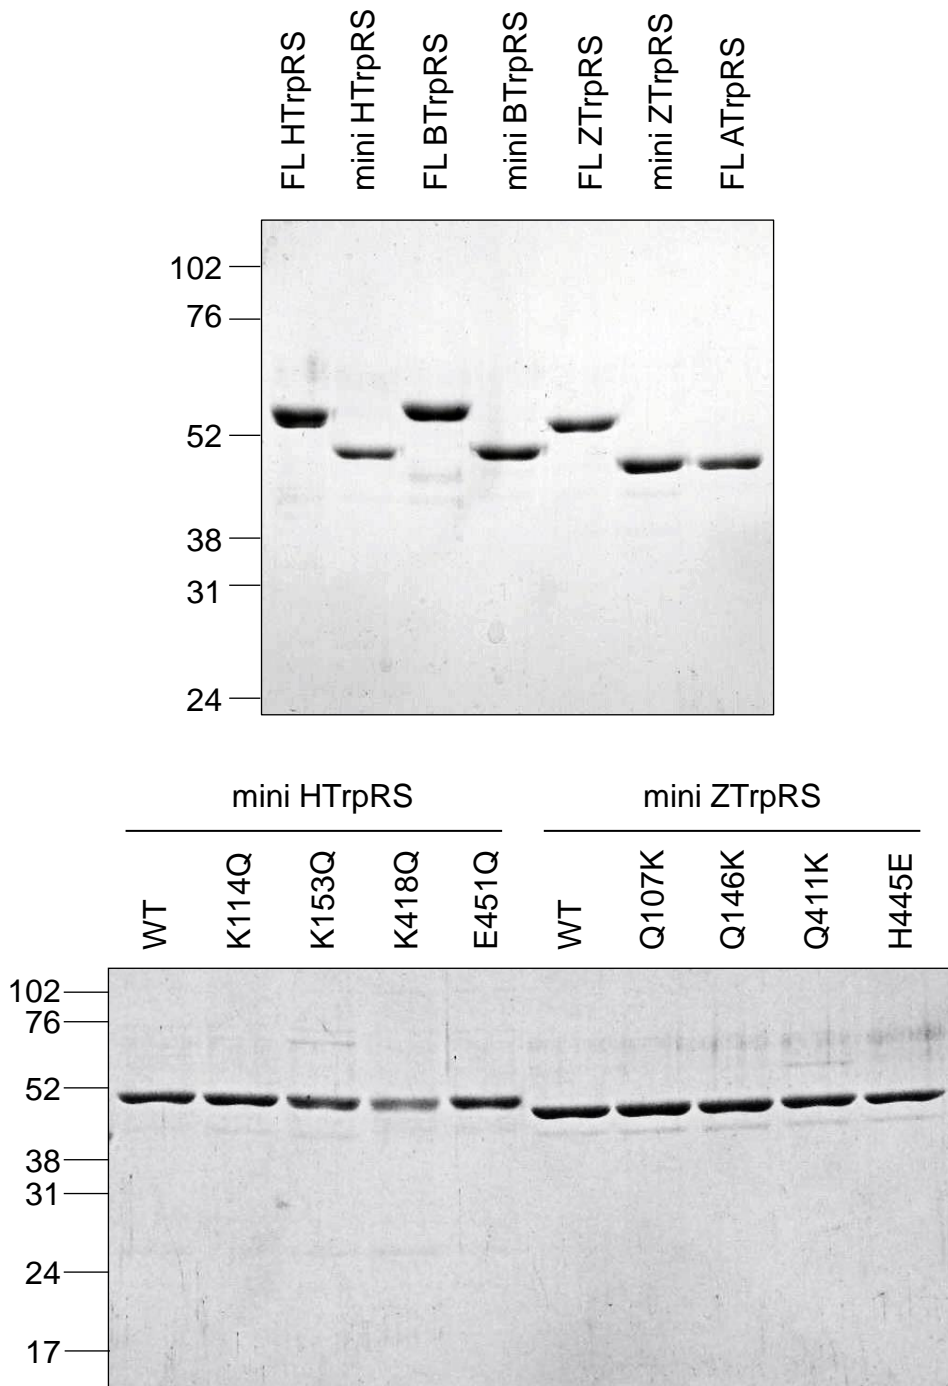

**Supplementary Figure S1. SDS-polyacrylamide gel electrophoresis of human, bovine, zebrafish and arabidopsis TrpRS constructs used in this study.** The samples were analyzed on a 12.0% SDS-polyacrylamide gel and stained with Coomassie Blue. Molecular size markers (in kilodaltons) are shown at the left.

|           |                                                                                                                           |        |      |
|-----------|---------------------------------------------------------------------------------------------------------------------------|--------|------|
|           | 1                                                                                                                         | → mini | → T2 |
| Human     | ----MPNSEPASLLELFNSIATQGELVRS LKAGNASKDEI DSAVKMLVSLKMSYKAAAGEDYKADCPGPNPAPTSNHGPDAAEEDFVDPWTVQTS SAKGIDYDKLIVRFGS        |        |      |
| Macaque   | -MANMPNSEPCASPLELFNSIATQGELVRS LKAGNASKDEI DSAVKMLLSLKMSYKAAMGEDYKADCPGPNPAPTSNHGPDAAEAEEDFVDPWTVQTS SAKGIDYDKLIVRFGS     |        |      |
| Bovine    | MADMSNGEQGCGSPLELFHSLAAQGELVRLDLKARNAAKDEI DSAVKMLLSLKTYSYKAAATGEDYKVDCCPGDPAPESGEGLDATAEADFVDPWTVQTS SAKGIDYDKLIVRFGS    |        |      |
| Chicken   | MADSPNCDLKLSPLQLFEKVTQEQEKVRLAKAGKAPKDEI DAAVRLLSLKLKSYKTTTGGQDYQAGLPPKDHALINNG--TTKEEDEDLVDPWVQVTSNAKGVQDYDKLIVRFGS      |        |      |
| Snake     | MADNPNGSFCSLKLPLELFEQIAAQGENVRS LKSKKESKDEI DAAVKLLLSLKVYKATATGQEQYKADSPPTDFTFVSN--PDNIEGDDFVDPWTVQVTSNAKGVQDYDKLIVRFGS   |        |      |
| Frog      | MSDSGTDASGSLIPMDLYDRVTAQGDKVRVLKSEKAPKEEIDVAVKLLLALKVDYKNTVGGQDYKPGVPPADDMP TNSNGPSTTDNGDDFVDPWVQVTSNAKGVQDYDKLIVRFGS     |        |      |
| Fugu      | -MADSPDFERTMSPLELYEKLTAQGDQVRALKTAKSDKAEI DAAVQLLLKMKLEYKQVTGQDYKAGSPPSENSAPFNGATADGSNDEDTVDPWVSTTNAKGVQDYDKLIVRFGS       |        |      |
| Zebrafish | -----MSSPLDLYECVTAQGETVRS IKAKKGSKEEVDAAVQVLLQMKLDYKRVTTGQDYKAGC PPDQGVTPQDGAAP--QDGEDQVDPWSVSSSSAKGVQDYDKLIVRFGS         |        |      |
| Human     | 114 SKIDKELINRIERATGQRPHHFLRRGIFFSHRDMNQVLDAYENKPFYLYTGRGPSSEAMHVGHLPFI FTKWLQDVFNVLVIQMTDDEKYLWKDLTLDQAYS YAVENAKDII     | 153    |      |
| Macaque   | SKIDKELINRIERATGQRPHRFLRRGIFFSHRDMNQVLDAYENKPFYLYTGRGPSSEAMHVGHLPFI FTKWLQDVFNVLVIQMTDDEKYLWKDLTLDQAYGYAVENAKDII          |        |      |
| Bovine    | SKIDKELVNRIERATGQRPHRFLRRGIFFSHRDMHQILDAYENKPFYLYTGRGPSSEAMHVGHLPFI FTKWLQDVFNVLVIQMTDDEKYLWKDLTLDQAYGYAVENAKDII          |        |      |
| Chicken   | TKIDTDLINRIERATGQKPHRFLRRGIFFSHRDMQILHAYENKPFYLYTGRGPSSEAMHVGHLPFI FTKWLQEAQFVPLVIQMTDDEKYLWKDMTEKAYEYAKENARDII           |        |      |
| Snake     | SKIDKDLINRIERITGHKPHHFLRRGIFFSHRDMNQILDAHEKKPFYLYTGRGPSSEAMHVGHLPFI FTKWLQETFNVLVIQMTDDEKYLWKDLTIEKAYQYAIENIKDII          |        |      |
| Frog      | SKIDQQLVDRIQRVTGQKPHHFLRRGIFFSHRDMHQVLDAYENKPFYLYTGRGPSSEALHVGHLPFI FTKWLQEVFNVLVQVLT DDEKYLWKDLTLEKAYQYAIENAKDII         |        |      |
| Fugu      | SKIDQQLVDRIEKVSGQKPHRFLRRGIFFSHRDMHQVLDAYENKPFYLYTGRGPSSEAMHVGHLPFI FTKWLQDVFDIPLVIQLT DDEKYLWKDLTIECHRFAVENAKDII         |        |      |
| Zebrafish | SKVDQELVDRI SRLTGKTPHRFLRRGIFFSHRDMHQILDAFEQQKPFYLYTGRGPSQA I HVGHLPFI FTKWLQDVFDVPLVIQLT DDEKYLWKDLTLEECRRFTVENARDII     |        |      |
| Human     | ACGFDINKTTFIFSDLDYMGMSGGFYKNVVKIQKHVTFNQVKGIFGFTSDSICIGKISFPAIQAA PFSNSFPQIFRDRTDIQCLIPCAIDQDPYFRMTRDVAPRIGYKPKALLHS      |        |      |
| Macaque   | ACGFDINKTTFIFSDLDYMGMSGGFYKNVVKIQKHVTFNQVKGIFGFTSDSICIGKISFPAIQAA PFSNSFPQIFQDRTDIQCLIPCAIDQDPYFRMTRDVAPRIGYKPKALLHS      |        |      |
| Bovine    | ACGFDINKTTFIFSDLDYMGMSPGFYKNVVKIQKHVTFNQVKGIFGFTSDSICIGKISFPAIQAA PFSNSFPQIFRDRTDVQCLIPCAIDQDPYFRMTRDVAPRIGYKPKALLHS      |        |      |
| Chicken   | ACGFDVNTKTFIFSDLDYLGSSGTFYKNI IKVQKHVTFNQVKGIFGFTSDSICIGKISFPAIQAA PFSNSFPQIFNGKENIQCLIPCAIDQDPYFRMTRDVAPRIGYKPKALLHS     |        |      |
| Snake     | ACGFDINKTTFIFSDFSYIGTSLGFYKNIVKVQKHVTFNQVKGIFGFTSDSICIGKISFPAIQAA PFSNSFPQIFNNRKDVQCLIPCAIDQDPYFRMTRDVAPRIGYKPKALLHS      |        |      |
| Frog      | ACGFDVNTKTFIFSDLEYMGKSGFYQNVVKVQKHVTFNQVKGIFGFTSDSICIGKISFPAIQAA PFSNSFPQIFKGRKDIQCLIPCAIDQDPYFRMTRDVAPRINYKPKALMHS       |        |      |
| Fugu      | ACGFDVNTKTFIFSDLDYMGASPEFYRNVVKIEKHVTFNQVKGIFGFTSDSICIGKISFPAIQAA PFSNSFPQIFGSRKDIQCLIPCAIDQDPYFRMTRDVAPRIGYKPKALLHS      |        |      |
| Zebrafish | ACGFDVNTKTFIFSDLEYMGASPAFYRNVVKVQKHVTFNQVKGIFGFTSDSICIGKISFPAIQAA PFSNSFPQIFGDRKDVQCLIPCAIDQDPYFRMTRDVAPRIGYKPKALLHS      |        |      |
| Human     | TFFPALQGAQT KMSASDPNSSIFLTD TAKQIKTKVNKHA FSGGRD TIEHRQFGGNC DVVSYMYL TFFLEDDDKLEQIRKDY TSGAMLTGELKKALIEVLQPLIAEHQARRKE   | 418    | 451  |
| Macaque   | TFFPALQGAQT KMSASDPNSSIFLTD TAKQIKTKVNKHA FSGGRD TIEHRQFGGNC DVVSYMYL TFFLEDDDKLEQIRKDY TSGNMLT GELKKVLI EVLQPLIAEHQARRKE |        |      |
| Bovine    | TFFPALQGAQT KMSASDPNSSIFLTD TAKQIKTKVNKHA FSGGRD TVEHRQFGGNC DVVSYMYL TFFLEDDDKLEQIRDY TSGAMLTGELKKELIEVLQPLIAEHQARRKE    |        |      |
| Chicken   | VFFPALQGAQT KMSASDVNSSVFLNDTPKQIKTKINKHAFSGGRD TIEHRKYG GNC DVVSYMYL TFFLEDDDKLEQLKQAY TSGELLT GELKKVLI ETLQPLIAAHQERRKQ  |        |      |
| Snake     | VFFPALQGAQT KMSASDPNSSIFLTDTPKQIKTKINKHAFSGGKDTVEHRQYGGNC DVVSYMYL TFFLEDDDRLEQIKQAY TSGALLT GELKKVLI ETLQPLIAAHQERRKQ    |        |      |
| Frog      | TFFPALQGAQT KMSASDPNSSIFLTD TAKQIKNKINKYAFSGGKDTIEHRQFGGNC DVVSYMYL TFFLEDDERLEQIKQDYSSGALLT GELKKLI ETLQPLIAAHQERRKH     |        |      |
| Fugu      | TFFPALQGAQT KMSASDANSTIFLTDTPKQIKTKVNKHA FSGGKDTVEHRKHGGNPDV VSYMYL TFFLEDDQLEKIRQDYASGALLT GELKKMLIDTLQPMIAHQERRKQ       |        |      |
| Zebrafish | TFFPALQGAQT KMSASDANSTIFLTDTPKQIKNKVNKHA FSGGKDTIEHRKLGDPDV VSYMYL TFFLEDDQLEKIRQDYSSGAMLT GELKKS LI DTLQPLIAEHQERRKH     |        |      |
| Human     | VTDEIVKEFMTPRKLSFDFQ                                                                                                      | 471    |      |
| Macaque   | VTDEIAKQFMTPRELSFDFQ                                                                                                      |        |      |
| Bovine    | VTDEIVKEFMTPRKLSYDFQ                                                                                                      |        |      |
| Chicken   | ITDEVVKQFMTPRKLAFF-                                                                                                       |        |      |
| Snake     | ITDEMVKFMTPRKLAFDY-                                                                                                       |        |      |
| Frog      | ITEEAVKQFMMPRKLAFF-                                                                                                       |        |      |
| Fugu      | VTDETQKQFMTFRPLNFKH-                                                                                                      |        |      |
| Zebrafish | VTDDIVQQFMTPRKLHFSC-                                                                                                      |        |      |

**Supplementary Figure S2. Sequence alignment among vertebrate TrpRS proteins.** Multiple sequence alignment was performed by Clustal W with manual adjustments. Gaps in the sequences are indicated by dashes. Numbers above the sequences correspond to those of the residues of human TrpRS. Conserved crucial acidic (Glu or Asp) and basic (Arg or Lys) residues are highlighted in yellow.
